# Supplementary material for: Pooled PCR testing of dried blood spots for infant HIV diagnosis is cost efficient and accurate
Source: BMC Infect Dis. 2019 Feb 11;19:136. doi: 10.1186/s12879-019-3767-z (PMC6371519; doi:10.1186/s12879-019-3767-z)
Supplement: Supplementary file 1 — NHLS Tygerberg data. This file contains the daily number of infant blood samples received at this lab and the number testing HIV positive between January 2009 and July 2015. (CSV 50 kb) [file 12879_2019_3767_MOESM1_ESM.csv]

Date	Weekday	Negative	Positive	Equivocal	Grand Total
2009/01/05	Monday	8	1	0	9
2009/01/06	Tuesday	8	1	0	9
2009/01/07	Wednesday	17	1	0	18
2009/01/08	Thursday	32	6	0	38
2009/01/09	Friday	43	1	0	44
2009/01/12	Monday	17	1	0	18
2009/01/13	Tuesday	39	4	0	43
2009/01/15	Thursday	34	2	0	36
2009/01/16	Friday	38	2	0	40
2009/01/19	Monday	38	5	1	44
2009/01/20	Tuesday	18	1	2	21
2009/01/21	Wednesday	19	2	0	21
2009/01/22	Thursday	34	5	1	40
2009/01/23	Friday	11	3	0	14
2009/01/26	Monday	18	2	0	20
2009/01/27	Tuesday	40	3	0	43
2009/01/28	Wednesday	19	2	0	21
2009/01/29	Thursday	38	1	1	40
2009/01/30	Friday	13	4	0	17
2009/02/02	Monday	27	3	0	30
2009/02/03	Tuesday	16	3	2	21
2009/02/04	Wednesday	16	0	1	17
2009/02/05	Thursday	53	6	1	60
2009/02/06	Friday	35	1	2	38
2009/02/09	Monday	18	3	0	21
2009/02/10	Tuesday	39	4	0	43
2009/02/11	Wednesday	38	2	0	40
2009/02/13	Friday	71	4	2	77
2009/02/16	Monday	20	2	0	22
2009/02/17	Tuesday	19	2	0	21
2009/02/18	Wednesday	18	1	1	20
2009/02/20	Friday	33	5	0	38
2009/02/23	Monday	33	0	1	34
2009/02/25	Wednesday	60	16	2	78
2009/02/27	Friday	72	7	2	81
2009/03/02	Monday	55	7	1	63
2009/03/03	Tuesday	60	10	2	72
2009/03/04	Wednesday	18	4	0	22
2009/03/05	Thursday	43	12	5	60
2009/03/06	Friday	112	14	3	129
2009/03/09	Monday	78	5	4	87
2009/03/10	Tuesday	121	16	3	140
2009/03/11	Wednesday	102	18	12	132
2009/03/12	Thursday	70	5	1	76
2009/03/13	Friday	150	16	5	171
2009/03/14	Saturday	58	15	5	78
2009/03/16	Monday	39	1	1	41
2009/03/17	Tuesday	148	8	8	164
2009/03/18	Wednesday	58	10	1	69
2009/03/19	Thursday	94	16	22	132
2009/03/20	Friday	49	4	2	55
2009/03/23	Monday	38	5	12	55
2009/03/24	Tuesday	18	2	0	20
2009/03/25	Wednesday	30	4	0	34
2009/03/26	Thursday	61	7	0	68
2009/03/27	Friday	57	2	1	60
2009/03/30	Monday	22	0	1	23
2009/03/31	Tuesday	35	5	2	42
2009/04/01	Wednesday	51	2	1	54
2009/04/02	Thursday	29	3	0	32
2009/04/03	Friday	79	9	1	89
2009/04/06	Monday	59	10	0	69
2009/04/07	Tuesday	74	6	0	80
2009/04/08	Wednesday	132	11	1	144
2009/04/09	Thursday	62	1	0	63
2009/04/14	Tuesday	74	5	0	79
2009/04/15	Wednesday	65	4	0	69
2009/04/16	Thursday	13	8	2	23
2009/04/17	Friday	33	4	0	37
2009/04/20	Monday	31	2	0	33
2009/04/21	Tuesday	75	4	1	80
2009/04/24	Friday	28	4	1	33
2009/04/28	Tuesday	36	4	0	40
2009/04/29	Wednesday	34	1	0	35
2009/04/30	Thursday	34	2	0	36
2009/05/04	Monday	38	0	0	38
2009/05/05	Tuesday	26	5	1	32
2009/05/06	Wednesday	35	2	1	38
2009/05/07	Thursday	30	4	0	34
2009/05/08	Friday	36	2	0	38
2009/05/11	Monday	15	1	0	16
2009/05/12	Tuesday	18	0	0	18
2009/05/13	Wednesday	37	2	1	40
2009/05/14	Thursday	34	3	2	39
2009/05/15	Friday	36	1	0	37
2009/05/18	Monday	35	1	0	36
2009/05/19	Tuesday	18	1	0	19
2009/05/20	Wednesday	16	1	1	18
2009/05/21	Thursday	16	3	0	19
2009/05/22	Friday	35	0	1	36
2009/05/25	Monday	18	1	0	19
2009/05/26	Tuesday	33	7	0	40
2009/05/27	Wednesday	32	2	0	34
2009/05/28	Thursday	37	0	1	38
2009/05/29	Friday	35	4	0	39
2009/06/01	Monday	16	1	0	17
2009/06/02	Tuesday	32	5	0	37
2009/06/03	Wednesday	19	1	0	20
2009/06/04	Thursday	39	0	0	39
2009/06/05	Friday	33	1	0	34
2009/06/08	Monday	40	0	0	40
2009/06/09	Tuesday	34	3	0	37
2009/06/10	Wednesday	16	0	0	16
2009/06/11	Thursday	37	3	0	40
2009/06/12	Friday	33	2	1	36
2009/06/17	Wednesday	50	6	1	57
2009/06/18	Thursday	17	3	0	20
2009/06/19	Friday	27	3	0	30
2009/06/22	Monday	32	1	3	36
2009/06/23	Tuesday	36	3	1	40
2009/06/24	Wednesday	15	0	0	15
2009/06/25	Thursday	31	4	0	35
2009/06/26	Friday	34	4	0	38
2009/06/29	Monday	33	3	0	36
2009/06/30	Tuesday	33	2	0	35
2009/07/01	Wednesday	16	1	0	17
2009/07/02	Thursday	36	2	0	38
2009/07/03	Friday	39	1	0	40
2009/07/07	Tuesday	37	0	0	37
2009/07/08	Wednesday	32	4	3	39
2009/07/09	Thursday	32	2	0	34
2009/07/10	Friday	19	1	0	20
2009/07/13	Monday	33	3	0	36
2009/07/14	Tuesday	32	5	0	37
2009/07/15	Wednesday	32	2	0	34
2009/07/16	Thursday	28	8	0	36
2009/07/17	Friday	33	0	0	33
2009/07/20	Monday	38	2	0	40
2009/07/21	Tuesday	34	2	1	37
2009/07/22	Wednesday	17	0	0	17
2009/07/23	Thursday	38	2	0	40
2009/07/24	Friday	51	7	0	58
2009/07/27	Monday	20	0	0	20
2009/07/28	Tuesday	32	0	0	32
2009/07/29	Wednesday	18	1	0	19
2009/07/30	Thursday	35	0	1	36
2009/07/31	Friday	17	2	0	19
2009/08/03	Monday	14	2	0	16
2009/08/04	Tuesday	2	0	0	2
2009/08/05	Wednesday	36	3	4	43
2009/08/06	Thursday	31	0	3	34
2009/08/07	Friday	36	6	0	42
2009/08/12	Wednesday	19	1	0	20
2009/08/13	Thursday	61	2	1	64
2009/08/14	Friday	58	4	0	62
2009/08/17	Monday	16	4	1	21
2009/08/18	Tuesday	39	3	1	43
2009/08/19	Wednesday	17	3	0	20
2009/08/20	Thursday	35	2	0	37
2009/08/21	Friday	17	1	0	18
2009/08/24	Monday	33	1	1	35
2009/08/25	Tuesday	17	1	0	18
2009/08/26	Wednesday	19	2	0	21
2009/08/27	Thursday	38	0	0	38
2009/08/28	Friday	37	3	0	40
2009/08/31	Monday	33	1	2	36
2009/09/01	Tuesday	35	2	0	37
2009/09/02	Wednesday	16	1	0	17
2009/09/03	Thursday	36	5	0	41
2009/09/04	Friday	31	4	0	35
2009/09/07	Monday	32	4	0	36
2009/09/08	Tuesday	19	2	0	21
2009/09/09	Wednesday	12	2	0	14
2009/09/10	Thursday	32	4	0	36
2009/09/11	Friday	14	1	0	15
2009/09/14	Monday	36	3	0	39
2009/09/16	Wednesday	53	4	0	57
2009/09/17	Thursday	33	3	0	36
2009/09/18	Friday	15	2	0	17
2009/09/21	Monday	35	3	0	38
2009/09/22	Tuesday	32	5	0	37
2009/09/23	Wednesday	15	0	0	15
2009/09/25	Friday	35	4	1	40
2009/09/28	Monday	15	0	0	15
2009/09/29	Tuesday	20	0	0	20
2009/09/30	Wednesday	17	3	0	20
2009/10/01	Thursday	36	2	0	38
2009/10/02	Friday	33	2	1	36
2009/10/05	Monday	20	0	0	20
2009/10/06	Tuesday	34	3	0	37
2009/10/07	Wednesday	36	1	1	38
2009/10/08	Thursday	15	3	0	18
2009/10/09	Friday	33	2	0	35
2009/10/13	Tuesday	56	1	0	57
2009/10/14	Wednesday	32	5	1	38
2009/10/16	Friday	49	9	0	58
2009/10/19	Monday	31	1	1	33
2009/10/20	Tuesday	35	2	1	38
2009/10/21	Wednesday	25	7	0	32
2009/10/22	Thursday	33	2	0	35
2009/10/23	Friday	13	4	0	17
2009/10/26	Monday	15	0	0	15
2009/10/27	Tuesday	35	5	0	40
2009/10/28	Wednesday	14	0	0	14
2009/10/29	Thursday	38	0	2	40
2009/10/30	Friday	15	1	0	16
2009/11/02	Monday	27	6	1	34
2009/11/03	Tuesday	26	3	3	32
2009/11/05	Thursday	36	1	0	37
2009/11/09	Monday	54	4	1	59
2009/11/10	Tuesday	34	1	0	35
2009/11/11	Wednesday	17	3	0	20
2009/11/12	Thursday	35	0	0	35
2009/11/13	Friday	20	0	0	20
2009/11/16	Monday	18	2	0	20
2009/11/17	Tuesday	35	4	0	39
2009/11/18	Wednesday	12	2	1	15
2009/11/19	Thursday	18	1	0	19
2009/11/20	Friday	33	4	0	37
2009/11/23	Monday	33	1	1	35
2009/11/24	Tuesday	16	3	0	19
2009/11/25	Wednesday	34	3	0	37
2009/11/26	Thursday	20	0	0	20
2009/11/27	Friday	15	2	0	17
2009/11/30	Monday	39	1	0	40
2009/12/01	Tuesday	16	1	0	17
2009/12/02	Wednesday	36	2	1	39
2009/12/04	Friday	15	2	0	17
2009/12/07	Monday	19	1	0	20
2009/12/08	Tuesday	32	4	0	36
2009/12/09	Wednesday	33	1	1	35
2009/12/11	Friday	35	1	2	38
2009/12/14	Monday	17	1	1	19
2009/12/15	Tuesday	17	0	0	17
2009/12/17	Thursday	14	0	0	14
2009/12/18	Friday	38	2	0	40
2009/12/20	Sunday	56	7	1	64
2009/12/22	Tuesday	17	2	1	20
2009/12/23	Wednesday	17	1	0	18
2009/12/29	Tuesday	62	2	0	64
2009/12/30	Wednesday	35	1	5	41
2009/12/31	Thursday	14	3	0	17
2010/01/04	Monday	34	3	1	38
2010/01/05	Tuesday	13	0	0	13
2010/01/06	Wednesday	17	1	2	20
2010/01/07	Thursday	19	0	2	21
2010/01/08	Friday	33	2	4	39
2010/01/11	Monday	17	1	1	19
2010/01/12	Tuesday	36	1	1	38
2010/01/13	Wednesday	37	1	0	38
2010/01/14	Thursday	34	1	4	39
2010/01/15	Friday	18	1	0	19
2010/01/18	Monday	32	2	0	34
2010/01/19	Tuesday	19	1	1	21
2010/01/20	Wednesday	32	2	0	34
2010/01/22	Friday	58	1	3	62
2010/01/25	Monday	11	1	1	13
2010/01/26	Tuesday	55	6	3	64
2010/01/27	Wednesday	17	0	0	17
2010/01/28	Thursday	30	1	1	32
2010/01/29	Friday	17	1	1	19
2010/02/01	Monday	19	1	0	20
2010/02/02	Tuesday	15	3	3	21
2010/02/03	Wednesday	17	1	2	20
2010/02/04	Thursday	30	3	2	35
2010/02/05	Friday	13	0	4	17
2010/02/08	Monday	18	1	2	21
2010/02/10	Wednesday	69	18	8	95
2010/02/11	Thursday	24	2	2	28
2010/02/12	Friday	32	2	4	38
2010/02/15	Monday	15	0	1	16
2010/02/16	Tuesday	54	1	3	58
2010/02/18	Thursday	70	3	4	77
2010/02/22	Monday	34	3	1	38
2010/02/23	Tuesday	49	6	6	61
2010/02/24	Wednesday	48	3	4	55
2010/02/25	Thursday	10	4	3	17
2010/02/26	Friday	49	6	3	58
2010/03/01	Monday	17	2	1	20
2010/03/02	Tuesday	18	0	3	21
2010/03/03	Wednesday	13	2	3	18
2010/03/04	Thursday	47	4	2	53
2010/03/05	Friday	32	2	2	36
2010/03/08	Monday	13	2	1	16
2010/03/09	Tuesday	17	3	0	20
2010/03/10	Wednesday	13	0	2	15
2010/03/11	Thursday	38	1	3	42
2010/03/12	Friday	80	2	4	86
2010/03/16	Tuesday	58	5	11	74
2010/03/17	Wednesday	8	0	1	9
2010/03/18	Thursday	48	5	2	55
2010/03/19	Friday	35	3	0	38
2010/03/23	Tuesday	31	6	3	40
2010/03/24	Wednesday	50	3	2	55
2010/03/25	Thursday	31	2	3	36
2010/03/29	Monday	36	2	3	41
2010/03/30	Tuesday	22	1	4	27
2010/03/31	Wednesday	15	1	2	18
2010/04/01	Thursday	66	5	4	75
2010/04/02	Friday	32	3	2	37
2010/04/07	Wednesday	34	2	0	36
2010/04/08	Thursday	38	3	0	41
2010/04/09	Friday	17	2	0	19
2010/04/12	Monday	36	3	0	39
2010/04/13	Tuesday	57	2	1	60
2010/04/14	Wednesday	20	0	0	20
2010/04/15	Thursday	35	4	1	40
2010/04/16	Friday	33	4	0	37
2010/04/21	Wednesday	39	3	0	42
2010/04/22	Thursday	63	5	0	68
2010/04/23	Friday	17	2	0	19
2010/04/26	Monday	14	2	0	16
2010/04/28	Wednesday	55	4	2	61
2010/04/29	Thursday	18	2	0	20
2010/04/30	Friday	16	1	0	17
2010/05/03	Monday	80	1	0	81
2010/05/04	Tuesday	14	2	1	17
2010/05/05	Wednesday	39	0	2	41
2010/05/06	Thursday	47	4	0	51
2010/05/11	Tuesday	73	5	1	79
2010/05/12	Wednesday	54	1	0	55
2010/05/14	Friday	50	2	1	53
2010/05/17	Monday	32	4	2	38
2010/05/18	Tuesday	32	0	0	32
2010/05/19	Wednesday	25	0	0	25
2010/05/21	Friday	37	4	0	41
2010/05/24	Monday	53	5	1	59
2010/05/25	Tuesday	54	2	1	57
2010/05/26	Wednesday	17	1	1	19
2010/05/28	Friday	54	1	1	56
2010/06/01	Tuesday	59	8	2	69
2010/06/02	Wednesday	21	0	0	21
2010/06/03	Thursday	14	2	0	16
2010/06/04	Friday	20	0	0	20
2010/06/07	Monday	38	2	0	40
2010/06/08	Tuesday	14	0	1	15
2010/06/09	Wednesday	39	2	1	42
2010/06/10	Thursday	36	5	0	41
2010/06/11	Friday	20	0	0	20
2010/06/14	Monday	38	0	0	38
2010/06/15	Tuesday	56	4	1	61
2010/06/18	Friday	17	0	0	17
2010/06/21	Monday	36	4	1	41
2010/06/22	Tuesday	35	3	0	38
2010/06/23	Wednesday	37	0	0	37
2010/06/25	Friday	56	4	0	60
2010/06/28	Monday	18	1	0	19
2010/06/29	Tuesday	34	0	0	34
2010/06/30	Wednesday	34	2	1	37
2010/07/01	Thursday	17	0	0	17
2010/07/02	Friday	55	4	0	59
2010/07/05	Monday	41	1	0	42
2010/07/07	Wednesday	20	1	0	21
2010/07/09	Friday	37	1	0	38
2010/07/12	Monday	74	3	0	77
2010/07/13	Tuesday	33	5	0	38
2010/07/15	Thursday	29	4	0	33
2010/07/16	Friday	19	1	0	20
2010/07/19	Monday	36	2	0	38
2010/07/20	Tuesday	36	3	0	39
2010/07/21	Wednesday	14	0	1	15
2010/07/22	Thursday	20	0	0	20
2010/07/23	Friday	19	0	1	20
2010/07/26	Monday	38	1	0	39
2010/07/27	Tuesday	38	3	0	41
2010/07/29	Thursday	18	2	0	20
2010/07/30	Friday	15	3	0	18
2010/08/02	Monday	17	1	0	18
2010/08/03	Tuesday	30	3	0	33
2010/08/04	Wednesday	33	1	0	34
2010/08/05	Thursday	39	2	0	41
2010/08/06	Friday	18	1	0	19
2010/08/10	Tuesday	17	1	0	18
2010/08/11	Wednesday	21	0	0	21
2010/08/12	Thursday	37	1	0	38
2010/08/13	Friday	37	2	0	39
2010/08/16	Monday	37	1	0	38
2010/08/17	Tuesday	19	1	1	21
2010/08/18	Wednesday	21	0	0	21
2010/08/19	Thursday	37	1	0	38
2010/08/20	Friday	20	1	0	21
2010/08/23	Monday	36	2	1	39
2010/08/24	Tuesday	53	6	0	59
2010/08/25	Wednesday	17	0	1	18
2010/08/26	Thursday	14	1	1	16
2010/08/30	Monday	35	4	0	39
2010/08/31	Tuesday	18	2	1	21
2010/09/01	Wednesday	18	0	0	18
2010/09/02	Thursday	18	1	0	19
2010/09/03	Friday	34	5	0	39
2010/09/06	Monday	36	3	0	39
2010/09/07	Tuesday	17	2	1	20
2010/09/08	Wednesday	11	2	0	13
2010/09/09	Thursday	44	2	2	48
2010/09/10	Friday	41	1	0	42
2010/09/14	Tuesday	29	2	0	31
2010/09/15	Wednesday	41	0	0	41
2010/09/16	Thursday	17	0	1	18
2010/09/17	Friday	54	2	1	57
2010/09/20	Monday	20	1	0	21
2010/09/21	Tuesday	38	2	0	40
2010/09/22	Wednesday	20	1	0	21
2010/09/23	Thursday	20	0	0	20
2010/09/24	Friday	14	0	0	14
2010/09/27	Monday	20	0	0	20
2010/09/28	Tuesday	22	3	0	25
2010/09/29	Wednesday	18	1	1	20
2010/09/30	Thursday	30	5	0	35
2010/10/01	Friday	38	0	2	40
2010/10/04	Monday	19	1	0	20
2010/10/05	Tuesday	34	4	0	38
2010/10/07	Thursday	34	4	2	40
2010/10/08	Friday	31	0	1	32
2010/10/11	Monday	19	0	0	19
2010/10/12	Tuesday	36	4	3	43
2010/10/13	Wednesday	4	0	0	4
2010/10/14	Thursday	24	6	1	31
2010/10/15	Friday	19	1	0	20
2010/10/19	Tuesday	56	5	0	61
2010/10/20	Wednesday	34	4	0	38
2010/10/21	Thursday	18	1	0	19
2010/10/22	Friday	36	3	0	39
2010/10/23	Saturday	19	1	0	20
2010/10/26	Tuesday	38	0	0	38
2010/10/27	Wednesday	20	1	0	21
2010/10/28	Thursday	38	0	1	39
2010/10/29	Friday	18	1	1	20
2010/10/30	Saturday	31	4	2	37
2010/11/02	Tuesday	41	1	0	42
2010/11/03	Wednesday	18	1	0	19
2010/11/04	Thursday	38	4	0	42
2010/11/05	Friday	16	2	1	19
2010/11/06	Saturday	40	1	1	42
2010/11/09	Tuesday	19	1	0	20
2010/11/10	Wednesday	32	8	0	40
2010/11/11	Thursday	35	0	0	35
2010/11/12	Friday	24	0	0	24
2010/11/13	Saturday	20	1	0	21
2010/11/15	Monday	19	0	0	19
2010/11/16	Tuesday	37	3	1	41
2010/11/17	Wednesday	40	0	1	41
2010/11/18	Thursday	40	1	0	41
2010/11/20	Saturday	19	0	2	21
2010/11/23	Tuesday	19	0	2	21
2010/11/24	Wednesday	21	0	9	30
2010/11/25	Thursday	18	0	3	21
2010/11/27	Saturday	15	2	3	20
2010/11/29	Monday	47	8	5	60
2010/11/30	Tuesday	26	0	3	29
2010/12/01	Wednesday	24	0	1	25
2010/12/02	Thursday	19	1	1	21
2010/12/03	Friday	32	4	0	36
2010/12/04	Saturday	20	0	0	20
2010/12/07	Tuesday	36	4	2	42
2010/12/08	Wednesday	17	3	0	20
2010/12/09	Thursday	38	2	1	41
2010/12/10	Friday	21	0	0	21
2010/12/14	Tuesday	45	1	1	47
2010/12/15	Wednesday	30	1	1	32
2010/12/17	Friday	20	1	0	21
2010/12/18	Saturday	40	3	3	46
2010/12/21	Tuesday	32	3	1	36
2010/12/22	Wednesday	40	0	0	40
2010/12/23	Thursday	17	2	2	21
2010/12/24	Friday	22	0	4	26
2010/12/29	Wednesday	16	2	1	19
2010/12/30	Thursday	35	0	7	42
2010/12/31	Friday	19	2	0	21
2011/01/04	Tuesday	38	1	1	40
2011/01/05	Wednesday	19	2	0	21
2011/01/06	Thursday	21	0	0	21
2011/01/08	Saturday	37	5	0	42
2011/01/11	Tuesday	37	1	0	38
2011/01/12	Wednesday	34	1	0	35
2011/01/13	Thursday	21	0	0	21
2011/01/14	Friday	28	3	0	31
2011/01/17	Monday	20	1	0	21
2011/01/18	Tuesday	30	2	1	33
2011/01/19	Wednesday	42	2	0	44
2011/01/20	Thursday	20	0	1	21
2011/01/21	Friday	18	3	0	21
2011/01/22	Saturday	20	0	0	20
2011/01/24	Monday	18	2	1	21
2011/01/25	Tuesday	21	0	0	21
2011/01/26	Wednesday	35	6	0	41
2011/01/27	Thursday	38	0	4	42
2011/01/28	Friday	19	2	0	21
2011/01/29	Saturday	21	0	0	21
2011/01/31	Monday	20	0	1	21
2011/02/01	Tuesday	16	2	0	18
2011/02/02	Wednesday	40	0	0	40
2011/02/03	Thursday	35	5	0	40
2011/02/04	Friday	18	3	0	21
2011/02/05	Saturday	18	0	0	18
2011/02/07	Monday	20	1	0	21
2011/02/08	Tuesday	9	0	1	10
2011/02/09	Wednesday	25	2	4	31
2011/02/10	Thursday	33	3	4	40
2011/02/11	Friday	24	2	1	27
2011/02/12	Saturday	18	2	1	21
2011/02/14	Monday	21	0	0	21
2011/02/15	Tuesday	36	3	0	39
2011/02/17	Thursday	29	0	0	29
2011/02/18	Friday	30	0	0	30
2011/02/19	Saturday	30	2	1	33
2011/02/22	Tuesday	60	2	0	62
2011/02/23	Wednesday	29	0	0	29
2011/02/24	Thursday	21	1	0	22
2011/02/25	Friday	56	4	0	60
2011/02/26	Saturday	18	2	0	20
2011/02/28	Monday	17	1	2	20
2011/03/01	Tuesday	16	0	1	17
2011/03/02	Wednesday	18	1	1	20
2011/03/03	Thursday	40	2	0	42
2011/03/04	Friday	11	0	0	11
2011/03/05	Saturday	34	0	0	34
2011/03/07	Monday	20	0	0	20
2011/03/08	Tuesday	30	2	0	32
2011/03/09	Wednesday	1	0	0	1
2011/03/10	Thursday	35	3	1	39
2011/03/11	Friday	41	2	6	49
2011/03/15	Tuesday	59	1	1	61
2011/03/17	Thursday	33	4	2	39
2011/03/18	Friday	38	0	2	40
2011/03/22	Tuesday	1	0	0	1
2011/03/23	Wednesday	59	2	1	62
2011/03/25	Friday	72	2	2	76
2011/03/29	Tuesday	21	0	0	21
2011/03/30	Wednesday	19	0	0	19
2011/03/31	Thursday	59	1	2	62
2011/04/01	Friday	22	0	0	22
2011/04/02	Saturday	26	1	2	29
2011/04/04	Monday	19	0	1	20
2011/04/05	Tuesday	39	4	0	43
2011/04/07	Thursday	61	2	2	65
2011/04/08	Friday	31	2	0	33
2011/04/09	Saturday	11	0	0	11
2011/04/12	Tuesday	39	3	1	43
2011/04/13	Wednesday	21	0	0	21
2011/04/14	Thursday	39	5	0	44
2011/04/15	Friday	37	2	0	39
2011/04/16	Saturday	39	1	0	40
2011/04/19	Tuesday	33	2	2	37
2011/04/20	Wednesday	27	3	0	30
2011/04/21	Thursday	38	3	0	41
2011/04/26	Tuesday	40	1	0	41
2011/04/28	Thursday	47	5	0	52
2011/04/29	Friday	40	1	0	41
2011/04/30	Saturday	7	0	1	8
2011/05/04	Wednesday	37	5	0	42
2011/05/05	Thursday	31	2	1	34
2011/05/06	Friday	53	0	0	53
2011/05/07	Saturday	46	1	1	48
2011/05/10	Tuesday	65	2	1	68
2011/05/11	Wednesday	28	0	1	29
2011/05/12	Thursday	21	0	0	21
2011/05/13	Friday	30	2	0	32
2011/05/14	Saturday	34	3	0	37
2011/05/16	Monday	20	0	1	21
2011/05/17	Tuesday	30	2	5	37
2011/05/20	Friday	64	5	10	79
2011/05/24	Tuesday	53	4	0	57
2011/05/25	Wednesday	61	5	0	66
2011/05/27	Friday	40	1	1	42
2011/05/28	Saturday	32	3	1	36
2011/05/30	Monday	52	1	0	53
2011/06/01	Wednesday	20	0	1	21
2011/06/02	Thursday	49	0	2	51
2011/06/03	Friday	34	1	1	36
2011/06/07	Tuesday	54	3	0	57
2011/06/08	Wednesday	19	0	2	21
2011/06/09	Thursday	41	1	0	42
2011/06/10	Friday	16	5	0	21
2011/06/11	Saturday	13	0	0	13
2011/06/13	Monday	20	1	1	22
2011/06/14	Tuesday	51	0	1	52
2011/06/15	Wednesday	37	1	1	39
2011/06/18	Saturday	39	4	0	43
2011/06/20	Monday	21	1	1	23
2011/06/21	Tuesday	45	3	1	49
2011/06/22	Wednesday	19	2	1	22
2011/06/23	Thursday	20	1	0	21
2011/06/24	Friday	64	2	1	67
2011/06/27	Monday	26	0	0	26
2011/06/28	Tuesday	21	0	1	22
2011/06/29	Wednesday	19	2	0	21
2011/06/30	Thursday	20	2	0	22
2011/07/01	Friday	23	1	3	27
2011/07/02	Saturday	32	0	0	32
2011/07/04	Monday	19	1	2	22
2011/07/05	Tuesday	1	0	0	1
2011/07/06	Wednesday	52	7	1	60
2011/07/07	Thursday	29	3	1	33
2011/07/08	Friday	20	1	1	22
2011/07/09	Saturday	19	2	0	21
2011/07/11	Monday	33	0	0	33
2011/07/12	Tuesday	20	1	1	22
2011/07/13	Wednesday	22	0	0	22
2011/07/14	Thursday	37	1	3	41
2011/07/16	Saturday	60	3	0	63
2011/07/18	Monday	29	5	0	34
2011/07/19	Tuesday	18	0	0	18
2011/07/20	Wednesday	22	0	0	22
2011/07/21	Thursday	30	2	1	33
2011/07/22	Friday	21	1	0	22
2011/07/23	Saturday	14	0	1	15
2011/07/25	Monday	30	1	0	31
2011/07/26	Tuesday	14	1	0	15
2011/07/27	Wednesday	22	0	4	26
2011/07/28	Thursday	21	1	0	22
2011/07/29	Friday	16	3	3	22
2011/08/01	Monday	21	1	0	22
2011/08/02	Tuesday	20	1	0	21
2011/08/03	Wednesday	35	1	1	37
2011/08/04	Thursday	30	0	4	34
2011/08/05	Friday	21	0	0	21
2011/08/08	Monday	21	0	0	21
2011/08/10	Wednesday	19	0	3	22
2011/08/11	Thursday	34	3	0	37
2011/08/12	Friday	18	2	1	21
2011/08/16	Tuesday	70	5	4	79
2011/08/17	Wednesday	21	0	0	21
2011/08/18	Thursday	38	5	0	43
2011/08/19	Friday	35	2	0	37
2011/08/20	Saturday	19	1	1	21
2011/08/22	Monday	17	1	4	22
2011/08/23	Tuesday	22	0	0	22
2011/08/24	Wednesday	36	1	2	39
2011/08/25	Thursday	21	1	0	22
2011/08/26	Friday	35	1	0	36
2011/08/27	Saturday	9	0	0	9
2011/08/29	Monday	18	4	0	22
2011/08/30	Tuesday	40	3	1	44
2011/08/31	Wednesday	13	1	0	14
2011/09/01	Thursday	50	2	7	59
2011/09/02	Friday	21	1	0	22
2011/09/05	Monday	23	0	0	23
2011/09/06	Tuesday	20	1	0	21
2011/09/08	Thursday	54	1	0	55
2011/09/09	Friday	22	0	0	22
2011/09/10	Saturday	26	2	1	29
2011/09/13	Tuesday	41	2	1	44
2011/09/14	Wednesday	31	1	1	33
2011/09/15	Thursday	56	1	0	57
2011/09/16	Friday	25	1	0	26
2011/09/17	Saturday	22	0	0	22
2011/09/20	Tuesday	51	2	1	54
2011/09/21	Wednesday	19	2	1	22
2011/09/22	Thursday	53	4	0	57
2011/09/23	Friday	18	0	1	19
2011/09/26	Monday	43	1	0	44
2011/09/27	Tuesday	17	0	1	18
2011/09/28	Wednesday	19	3	0	22
2011/09/29	Thursday	35	1	0	36
2011/09/30	Friday	36	2	0	38
2011/10/03	Monday	28	0	2	30
2011/10/04	Tuesday	26	1	0	27
2011/10/05	Wednesday	39	2	1	42
2011/10/06	Thursday	15	5	0	20
2011/10/07	Friday	36	1	0	37
2011/10/10	Monday	46	3	0	49
2011/10/11	Tuesday	14	2	0	16
2011/10/12	Wednesday	23	0	0	23
2011/10/13	Thursday	31	2	0	33
2011/10/14	Friday	39	2	0	41
2011/10/17	Monday	25	4	1	30
2011/10/18	Tuesday	17	0	0	17
2011/10/19	Wednesday	41	3	0	44
2011/10/20	Thursday	37	2	2	41
2011/10/21	Friday	22	1	4	27
2011/10/24	Monday	38	1	0	39
2011/10/25	Tuesday	30	0	0	30
2011/10/26	Wednesday	32	2	1	35
2011/10/27	Thursday	4	5	0	9
2011/10/28	Friday	2	0	0	2
2011/10/29	Saturday	7	0	0	7
2011/10/31	Monday	47	7	1	55
2011/11/01	Tuesday	9	0	0	9
2011/11/02	Wednesday	59	3	1	63
2011/11/03	Thursday	41	0	0	41
2011/11/04	Friday	21	0	1	22
2011/11/05	Saturday	5	1	0	6
2011/11/07	Monday	15	1	0	16
2011/11/08	Tuesday	25	1	1	27
2011/11/09	Wednesday	39	1	0	40
2011/11/10	Thursday	36	1	0	37
2011/11/12	Saturday	24	0	0	24
2011/11/16	Wednesday	68	4	1	73
2011/11/17	Thursday	36	0	3	39
2011/11/18	Friday	20	0	1	21
2011/11/19	Saturday	13	0	1	14
2011/11/21	Monday	23	2	4	29
2011/11/23	Wednesday	37	2	2	41
2011/11/24	Thursday	20	0	0	20
2011/11/25	Friday	39	1	0	40
2011/11/28	Monday	39	3	2	44
2011/11/29	Tuesday	25	2	1	28
2011/11/30	Wednesday	21	1	0	22
2011/12/01	Thursday	31	1	1	33
2011/12/02	Friday	22	0	0	22
2011/12/05	Monday	20	1	0	21
2011/12/06	Tuesday	20	2	0	22
2011/12/07	Wednesday	33	2	0	35
2011/12/08	Thursday	31	0	0	31
2011/12/09	Friday	22	0	0	22
2011/12/12	Monday	35	2	1	38
2011/12/13	Tuesday	20	1	0	21
2011/12/14	Wednesday	42	1	0	43
2011/12/15	Thursday	21	0	0	21
2011/12/19	Monday	18	3	0	21
2011/12/20	Tuesday	41	1	1	43
2011/12/21	Wednesday	22	0	0	22
2011/12/22	Thursday	40	1	0	41
2011/12/23	Friday	22	0	0	22
2011/12/28	Wednesday	30	4	0	34
2011/12/29	Thursday	22	0	0	22
2011/12/31	Saturday	43	0	0	43
2012/01/03	Tuesday	41	1	1	43
2012/01/04	Wednesday	32	0	0	32
2012/01/05	Thursday	17	1	1	19
2012/01/06	Friday	22	0	0	22
2012/01/07	Saturday	5	0	0	5
2012/01/09	Monday	21	0	1	22
2012/01/10	Tuesday	32	0	0	32
2012/01/11	Wednesday	30	1	0	31
2012/01/12	Thursday	28	2	2	32
2012/01/13	Friday	27	0	3	30
2012/01/16	Monday	29	1	2	32
2012/01/17	Tuesday	17	0	0	17
2012/01/18	Wednesday	43	1	0	44
2012/01/19	Thursday	38	3	0	41
2012/01/20	Friday	43	0	0	43
2012/01/21	Saturday	4	0	0	4
2012/01/23	Monday	19	2	0	21
2012/01/24	Tuesday	41	2	0	43
2012/01/25	Wednesday	41	1	0	42
2012/01/26	Thursday	39	2	0	41
2012/01/27	Friday	29	1	0	30
2012/01/30	Monday	21	1	0	22
2012/01/31	Tuesday	36	4	2	42
2012/02/01	Wednesday	37	1	1	39
2012/02/02	Thursday	21	1	0	22
2012/02/03	Friday	47	3	0	50
2012/02/06	Monday	39	0	0	39
2012/02/07	Tuesday	27	1	0	28
2012/02/08	Wednesday	36	1	0	37
2012/02/09	Thursday	22	0	0	22
2012/02/10	Friday	29	3	0	32
2012/02/11	Saturday	13	3	0	16
2012/02/13	Monday	19	2	0	21
2012/02/14	Tuesday	38	1	0	39
2012/02/15	Wednesday	19	2	0	21
2012/02/16	Thursday	37	0	0	37
2012/02/17	Friday	43	1	0	44
2012/02/18	Saturday	6	2	0	8
2012/02/20	Monday	36	1	1	38
2012/02/21	Tuesday	26	1	0	27
2012/02/22	Wednesday	41	1	2	44
2012/02/24	Friday	76	2	1	79
2012/02/27	Monday	27	0	2	29
2012/02/29	Wednesday	58	1	1	60
2012/03/01	Thursday	46	6	0	52
2012/03/02	Friday	32	2	0	34
2012/03/05	Monday	38	2	0	40
2012/03/06	Tuesday	19	1	0	20
2012/03/07	Wednesday	34	0	2	36
2012/03/08	Thursday	22	0	0	22
2012/03/09	Friday	32	0	0	32
2012/03/10	Saturday	30	0	0	30
2012/03/12	Monday	22	0	0	22
2012/03/13	Tuesday	41	2	1	44
2012/03/14	Wednesday	22	0	0	22
2012/03/15	Thursday	67	3	1	71
2012/03/16	Friday	43	0	1	44
2012/03/19	Monday	57	1	0	58
2012/03/20	Tuesday	20	2	0	22
2012/03/22	Thursday	50	2	2	54
2012/03/23	Friday	18	3	0	21
2012/03/24	Saturday	20	1	1	22
2012/03/26	Monday	42	1	0	43
2012/03/27	Tuesday	38	2	0	40
2012/03/28	Wednesday	40	1	2	43
2012/03/29	Thursday	14	0	3	17
2012/03/30	Friday	53	0	3	56
2012/04/02	Monday	29	2	1	32
2012/04/03	Tuesday	32	1	2	35
2012/04/04	Wednesday	38	2	0	40
2012/04/05	Thursday	30	3	0	33
2012/04/10	Tuesday	55	1	4	60
2012/04/11	Wednesday	35	2	4	41
2012/04/12	Thursday	21	0	1	22
2012/04/13	Friday	32	1	0	33
2012/04/14	Saturday	37	2	3	42
2012/04/16	Monday	31	2	4	37
2012/04/17	Tuesday	45	1	6	52
2012/04/18	Wednesday	20	1	1	22
2012/04/19	Thursday	43	1	0	44
2012/04/20	Friday	20	1	0	21
2012/04/21	Saturday	8	0	0	8
2012/04/23	Monday	20	2	0	22
2012/04/24	Tuesday	21	0	0	21
2012/04/25	Wednesday	65	0	0	65
2012/04/26	Thursday	19	0	0	19
2012/04/27	Friday	27	1	0	28
2012/04/30	Monday	21	0	0	21
2012/05/02	Wednesday	55	1	0	56
2012/05/03	Thursday	32	1	0	33
2012/05/04	Friday	43	1	0	44
2012/05/07	Monday	44	0	0	44
2012/05/08	Tuesday	42	1	1	44
2012/05/09	Wednesday	50	2	0	52
2012/05/10	Thursday	43	0	0	43
2012/05/11	Friday	19	1	0	20
2012/05/12	Saturday	20	2	0	22
2012/05/15	Tuesday	78	8	1	87
2012/05/16	Wednesday	44	0	0	44
2012/05/17	Thursday	39	1	1	41
2012/05/18	Friday	39	1	0	40
2012/05/21	Monday	34	2	0	36
2012/05/22	Tuesday	26	2	0	28
2012/05/23	Wednesday	37	6	0	43
2012/05/24	Thursday	59	9	1	69
2012/05/25	Friday	34	2	1	37
2012/05/28	Monday	46	8	0	54
2012/05/29	Tuesday	29	1	0	30
2012/05/30	Wednesday	43	0	0	43
2012/05/31	Thursday	33	6	0	39
2012/06/01	Friday	21	1	0	22
2012/06/02	Saturday	21	1	0	22
2012/06/05	Tuesday	61	3	2	66
2012/06/06	Wednesday	22	0	0	22
2012/06/07	Thursday	61	3	0	64
2012/06/08	Friday	33	4	0	37
2012/06/11	Monday	26	5	0	31
2012/06/12	Tuesday	21	1	0	22
2012/06/13	Wednesday	21	0	0	21
2012/06/14	Thursday	47	0	1	48
2012/06/15	Friday	34	1	0	35
2012/06/16	Saturday	24	2	1	27
2012/06/18	Monday	19	2	0	21
2012/06/19	Tuesday	41	2	0	43
2012/06/20	Wednesday	29	0	0	29
2012/06/21	Thursday	76	2	0	78
2012/06/22	Friday	18	4	0	22
2012/06/23	Saturday	14	2	0	16
2012/06/25	Monday	42	3	1	46
2012/06/26	Tuesday	21	1	0	22
2012/06/27	Wednesday	38	1	0	39
2012/06/28	Thursday	21	1	0	22
2012/06/29	Friday	35	1	0	36
2012/07/02	Monday	20	1	0	21
2012/07/03	Tuesday	39	5	0	44
2012/07/04	Wednesday	34	0	0	34
2012/07/05	Thursday	21	1	0	22
2012/07/06	Friday	44	1	0	45
2012/07/09	Monday	22	0	0	22
2012/07/10	Tuesday	42	1	1	44
2012/07/11	Wednesday	43	1	0	44
2012/07/12	Thursday	47	2	2	51
2012/07/13	Friday	21	1	0	22
2012/07/14	Saturday	30	1	0	31
2012/07/16	Monday	20	1	0	21
2012/07/17	Tuesday	36	1	1	38
2012/07/18	Wednesday	41	1	0	42
2012/07/19	Thursday	29	0	1	30
2012/07/20	Friday	42	1	1	44
2012/07/21	Saturday	20	1	0	21
2012/07/23	Monday	44	0	0	44
2012/07/24	Tuesday	22	0	1	23
2012/07/25	Wednesday	22	0	0	22
2012/07/26	Thursday	43	1	0	44
2012/07/27	Friday	50	4	0	54
2012/07/31	Tuesday	60	2	2	64
2012/08/01	Wednesday	38	0	0	38
2012/08/02	Thursday	46	0	0	46
2012/08/03	Friday	18	2	2	22
2012/08/04	Saturday	9	0	0	9
2012/08/06	Monday	39	0	0	39
2012/08/07	Tuesday	22	0	0	22
2012/08/10	Friday	43	1	0	44
2012/08/11	Saturday	32	2	1	35
2012/08/13	Monday	21	0	0	21
2012/08/14	Tuesday	40	2	0	42
2012/08/15	Wednesday	41	1	2	44
2012/08/16	Thursday	65	4	1	70
2012/08/17	Friday	21	1	0	22
2012/08/18	Saturday	30	2	0	32
2012/08/20	Monday	20	2	0	22
2012/08/21	Tuesday	16	0	0	16
2012/08/22	Wednesday	34	3	0	37
2012/08/23	Thursday	22	0	0	22
2012/08/24	Friday	37	1	5	43
2012/08/25	Saturday	52	2	0	54
2012/08/27	Monday	22	0	0	22
2012/08/28	Tuesday	21	0	0	21
2012/08/29	Wednesday	29	0	0	29
2012/08/30	Thursday	64	0	0	64
2012/08/31	Friday	20	1	0	21
2012/09/01	Saturday	10	0	0	10
2012/09/03	Monday	43	1	0	44
2012/09/04	Tuesday	45	3	0	48
2012/09/05	Wednesday	22	0	0	22
2012/09/06	Thursday	43	1	0	44
2012/09/07	Friday	41	2	1	44
2012/09/08	Saturday	13	0	0	13
2012/09/10	Monday	19	3	0	22
2012/09/11	Tuesday	17	0	0	17
2012/09/13	Thursday	58	3	2	63
2012/09/14	Friday	64	0	0	64
2012/09/15	Saturday	16	1	1	18
2012/09/17	Monday	21	1	0	22
2012/09/18	Tuesday	42	1	0	43
2012/09/19	Wednesday	41	3	0	44
2012/09/20	Thursday	64	1	1	66
2012/09/21	Friday	23	0	0	23
2012/09/22	Saturday	36	6	0	42
2012/09/25	Tuesday	43	0	0	43
2012/09/26	Wednesday	36	2	1	39
2012/09/27	Thursday	17	3	1	21
2012/09/28	Friday	63	0	0	63
2012/09/29	Saturday	43	1	0	44
2012/10/01	Monday	21	0	1	22
2012/10/02	Tuesday	49	2	1	52
2012/10/03	Wednesday	24	0	0	24
2012/10/04	Thursday	17	0	0	17
2012/10/05	Friday	40	4	0	44
2012/10/06	Saturday	17	0	0	17
2012/10/08	Monday	21	0	0	21
2012/10/09	Tuesday	43	1	0	44
2012/10/10	Wednesday	42	2	0	44
2012/10/11	Thursday	52	2	1	55
2012/10/12	Friday	41	0	0	41
2012/10/15	Monday	39	2	0	41
2012/10/16	Tuesday	37	3	0	40
2012/10/17	Wednesday	40	0	0	40
2012/10/18	Thursday	37	1	0	38
2012/10/19	Friday	33	1	1	35
2012/10/22	Monday	37	1	0	38
2012/10/23	Tuesday	17	1	0	18
2012/10/24	Wednesday	22	0	0	22
2012/10/25	Thursday	20	1	1	22
2012/10/26	Friday	37	1	0	38
2012/10/27	Saturday	42	2	0	44
2012/10/29	Monday	46	3	1	50
2012/10/30	Tuesday	20	1	0	21
2012/10/31	Wednesday	41	1	0	42
2012/11/01	Thursday	32	1	1	34
2012/11/02	Friday	12	1	0	13
2012/11/05	Monday	55	1	0	56
2012/11/06	Tuesday	20	2	0	22
2012/11/07	Wednesday	21	1	0	22
2012/11/08	Thursday	22	0	0	22
2012/11/09	Friday	45	3	0	48
2012/11/10	Saturday	38	1	1	40
2012/11/13	Tuesday	22	0	0	22
2012/11/14	Wednesday	21	0	0	21
2012/11/15	Thursday	82	3	0	85
2012/11/16	Friday	35	2	0	37
2012/11/19	Monday	19	2	1	22
2012/11/20	Tuesday	20	2	0	22
2012/11/21	Wednesday	24	4	0	28
2012/11/22	Thursday	61	6	0	67
2012/11/23	Friday	30	0	1	31
2012/11/26	Monday	21	1	0	22
2012/11/27	Tuesday	62	10	1	73
2012/11/28	Wednesday	30	0	0	30
2012/11/29	Thursday	21	1	0	22
2012/11/30	Friday	44	0	0	44
2012/12/03	Monday	21	1	0	22
2012/12/04	Tuesday	9	0	0	9
2012/12/05	Wednesday	62	2	0	64
2012/12/06	Thursday	60	0	0	60
2012/12/07	Friday	43	1	0	44
2012/12/08	Saturday	11	0	0	11
2012/12/10	Monday	22	0	0	22
2012/12/11	Tuesday	21	1	0	22
2012/12/12	Wednesday	39	0	1	40
2012/12/13	Thursday	44	0	0	44
2012/12/14	Friday	53	2	0	55
2012/12/15	Saturday	9	0	0	9
2012/12/18	Tuesday	38	2	0	40
2012/12/19	Wednesday	57	4	0	61
2012/12/20	Thursday	41	3	0	44
2012/12/21	Friday	55	3	0	58
2012/12/27	Thursday	40	4	0	44
2012/12/28	Friday	17	0	0	17
2012/12/31	Monday	53	2	1	56
2013/01/02	Wednesday	30	2	0	32
2013/01/04	Friday	37	1	0	38
2013/01/05	Saturday	7	0	0	7
2013/01/07	Monday	39	3	0	42
2013/01/08	Tuesday	18	0	0	18
2013/01/09	Wednesday	10	0	0	10
2013/01/10	Thursday	76	0	1	77
2013/01/11	Friday	55	2	0	57
2013/01/14	Monday	35	3	0	38
2013/01/15	Tuesday	23	0	0	23
2013/01/16	Wednesday	42	0	0	42
2013/01/17	Thursday	65	2	0	67
2013/01/18	Friday	35	2	0	37
2013/01/21	Monday	39	4	0	43
2013/01/22	Tuesday	44	0	0	44
2013/01/23	Wednesday	41	1	0	42
2013/01/24	Thursday	86	2	0	88
2013/01/25	Friday	21	1	0	22
2013/01/26	Saturday	20	2	0	22
2013/01/28	Monday	33	1	0	34
2013/01/29	Tuesday	53	3	0	56
2013/01/30	Wednesday	21	1	0	22
2013/01/31	Thursday	38	1	0	39
2013/02/01	Friday	61	3	2	66
2013/02/02	Saturday	20	0	0	20
2013/02/04	Monday	20	2	0	22
2013/02/05	Tuesday	59	2	0	61
2013/02/06	Wednesday	40	1	0	41
2013/02/07	Thursday	42	0	0	42
2013/02/08	Friday	55	3	0	58
2013/02/11	Monday	40	2	0	42
2013/02/12	Tuesday	22	0	0	22
2013/02/14	Thursday	86	0	1	87
2013/02/15	Friday	36	1	0	37
2013/02/16	Saturday	12	1	0	13
2013/02/18	Monday	43	0	0	43
2013/02/19	Tuesday	22	0	0	22
2013/02/20	Wednesday	58	3	1	62
2013/02/21	Thursday	40	4	0	44
2013/02/22	Friday	49	4	1	54
2013/02/23	Saturday	31	2	0	33
2013/02/25	Monday	19	1	1	21
2013/02/26	Tuesday	57	3	1	61
2013/02/27	Wednesday	43	0	0	43
2013/02/28	Thursday	22	0	0	22
2013/03/01	Friday	40	0	0	40
2013/03/02	Saturday	18	1	1	20
2013/03/04	Monday	38	2	1	41
2013/03/05	Tuesday	31	0	1	32
2013/03/06	Wednesday	30	1	0	31
2013/03/07	Thursday	64	0	0	64
2013/03/08	Friday	33	0	0	33
2013/03/09	Saturday	33	0	2	35
2013/03/12	Tuesday	56	2	0	58
2013/03/13	Wednesday	35	1	0	36
2013/03/14	Thursday	40	0	1	41
2013/03/15	Friday	37	1	0	38
2013/03/18	Monday	22	0	0	22
2013/03/20	Wednesday	21	1	0	22
2013/03/21	Thursday	19	2	0	21
2013/03/22	Friday	1	0	0	1
2013/03/23	Saturday	37	2	2	41
2013/03/25	Monday	38	1	1	40
2013/03/26	Tuesday	59	1	0	60
2013/03/27	Wednesday	81	1	0	82
2013/03/28	Thursday	60	0	1	61
2013/03/29	Friday	60	5	1	66
2013/04/02	Tuesday	2	0	0	2
2013/04/03	Wednesday	61	5	0	66
2013/04/04	Thursday	82	1	0	83
2013/04/05	Friday	92	4	0	96
2013/04/06	Saturday	38	0	0	38
2013/04/09	Tuesday	74	2	1	77
2013/04/10	Wednesday	36	0	0	36
2013/04/11	Thursday	58	1	1	60
2013/04/12	Friday	41	1	0	42
2013/04/13	Saturday	20	1	0	21
2013/04/15	Monday	0	1	0	1
2013/04/16	Tuesday	77	2	0	79
2013/04/17	Wednesday	60	1	1	62
2013/04/18	Thursday	62	1	0	63
2013/04/19	Friday	48	8	0	56
2013/04/22	Monday	52	1	0	53
2013/04/23	Tuesday	56	0	1	57
2013/04/24	Wednesday	22	0	0	22
2013/04/25	Thursday	64	2	0	66
2013/04/26	Friday	64	9	0	73
2013/04/29	Monday	53	1	0	54
2013/04/30	Tuesday	22	0	0	22
2013/05/02	Thursday	37	0	0	37
2013/05/03	Friday	52	3	0	55
2013/05/04	Saturday	15	0	0	15
2013/05/06	Monday	22	0	0	22
2013/05/07	Tuesday	22	3	0	25
2013/05/08	Wednesday	37	2	0	39
2013/05/09	Thursday	21	1	0	22
2013/05/10	Friday	68	1	0	69
2013/05/11	Saturday	43	0	0	43
2013/05/13	Monday	21	1	0	22
2013/05/14	Tuesday	40	4	0	44
2013/05/15	Wednesday	40	1	0	41
2013/05/16	Thursday	57	2	0	59
2013/05/17	Friday	22	0	2	24
2013/05/18	Saturday	22	0	0	22
2013/05/20	Monday	20	2	0	22
2013/05/21	Tuesday	42	2	0	44
2013/05/22	Wednesday	56	1	0	57
2013/05/23	Thursday	70	0	1	71
2013/05/24	Friday	13	0	1	14
2013/05/25	Saturday	44	0	0	44
2013/05/27	Monday	18	2	0	20
2013/05/28	Tuesday	32	0	1	33
2013/05/29	Wednesday	64	2	0	66
2013/05/30	Thursday	44	0	0	44
2013/05/31	Friday	47	0	0	47
2013/06/03	Monday	20	1	1	22
2013/06/04	Tuesday	44	0	0	44
2013/06/05	Wednesday	21	1	0	22
2013/06/06	Thursday	51	2	0	53
2013/06/07	Friday	19	1	0	20
2013/06/08	Saturday	22	0	0	22
2013/06/10	Monday	19	0	0	19
2013/06/11	Tuesday	74	1	0	75
2013/06/12	Wednesday	23	0	0	23
2013/06/13	Thursday	44	0	0	44
2013/06/14	Friday	52	1	0	53
2013/06/15	Saturday	16	0	0	16
2013/06/18	Tuesday	21	1	0	22
2013/06/19	Wednesday	41	2	0	43
2013/06/20	Thursday	41	0	0	41
2013/06/21	Friday	42	2	2	46
2013/06/22	Saturday	22	0	0	22
2013/06/24	Monday	23	0	0	23
2013/06/25	Tuesday	71	4	1	76
2013/06/26	Wednesday	37	2	1	40
2013/06/27	Thursday	33	0	1	34
2013/06/28	Friday	22	0	0	22
2013/06/29	Saturday	13	1	0	14
2013/07/01	Monday	22	1	0	23
2013/07/02	Tuesday	42	2	0	44
2013/07/03	Wednesday	44	0	0	44
2013/07/04	Thursday	77	4	0	81
2013/07/05	Friday	21	1	0	22
2013/07/06	Saturday	20	2	0	22
2013/07/08	Monday	44	0	0	44
2013/07/09	Tuesday	31	1	1	33
2013/07/10	Wednesday	44	0	0	44
2013/07/11	Thursday	22	0	0	22
2013/07/12	Friday	61	2	0	63
2013/07/13	Saturday	26	3	0	29
2013/07/15	Monday	37	1	0	38
2013/07/16	Tuesday	20	2	0	22
2013/07/17	Wednesday	44	0	0	44
2013/07/18	Thursday	31	1	0	32
2013/07/19	Friday	62	3	0	65
2013/07/22	Monday	19	2	0	21
2013/07/23	Tuesday	63	4	0	67
2013/07/24	Wednesday	21	1	0	22
2013/07/25	Thursday	52	5	0	57
2013/07/26	Friday	40	1	0	41
2013/07/29	Monday	20	0	0	20
2013/07/30	Tuesday	56	0	0	56
2013/07/31	Wednesday	41	2	0	43
2013/08/01	Thursday	43	1	0	44
2013/08/02	Friday	63	0	0	63
2013/08/05	Monday	43	1	0	44
2013/08/06	Tuesday	7	0	0	7
2013/08/07	Wednesday	63	2	0	65
2013/08/08	Thursday	60	1	0	61
2013/08/12	Monday	43	0	0	43
2013/08/13	Tuesday	44	0	0	44
2013/08/14	Wednesday	42	0	0	42
2013/08/15	Thursday	43	0	0	43
2013/08/16	Friday	81	0	0	81
2013/08/19	Monday	42	2	0	44
2013/08/20	Tuesday	42	2	0	44
2013/08/21	Wednesday	20	0	0	20
2013/08/22	Thursday	85	3	0	88
2013/08/23	Friday	59	2	1	62
2013/08/27	Tuesday	80	1	1	82
2013/08/28	Wednesday	43	1	0	44
2013/08/30	Friday	72	7	2	81
2013/09/02	Monday	41	2	0	43
2013/09/03	Tuesday	42	1	1	44
2013/09/04	Wednesday	41	2	1	44
2013/09/05	Thursday	76	0	0	76
2013/09/06	Friday	19	1	1	21
2013/09/07	Saturday	26	0	0	26
2013/09/09	Monday	19	2	0	21
2013/09/10	Tuesday	42	2	0	44
2013/09/11	Wednesday	67	1	0	68
2013/09/12	Thursday	39	0	0	39
2013/09/13	Friday	27	1	1	29
2013/09/14	Saturday	38	2	0	40
2013/09/16	Monday	21	1	0	22
2013/09/17	Tuesday	39	1	0	40
2013/09/18	Wednesday	62	0	0	62
2013/09/19	Thursday	79	2	0	81
2013/09/20	Friday	53	0	1	54
2013/09/21	Saturday	21	1	0	22
2013/09/23	Monday	39	2	0	41
2013/09/25	Wednesday	19	2	0	21
2013/09/26	Thursday	60	1	0	61
2013/09/27	Friday	57	9	4	70
2013/09/28	Saturday	32	1	0	33
2013/09/30	Monday	22	0	0	22
2013/10/01	Tuesday	65	0	0	65
2013/10/02	Wednesday	51	3	1	55
2013/10/03	Thursday	31	2	0	33
2013/10/04	Friday	71	2	1	74
2013/10/05	Saturday	5	0	0	5
2013/10/07	Monday	52	1	0	53
2013/10/08	Tuesday	31	1	0	32
2013/10/09	Wednesday	56	4	0	60
2013/10/10	Thursday	54	1	0	55
2013/10/11	Friday	18	2	0	20
2013/10/12	Saturday	12	0	0	12
2013/10/14	Monday	42	2	0	44
2013/10/15	Tuesday	59	3	0	62
2013/10/16	Wednesday	22	0	0	22
2013/10/17	Thursday	41	1	0	42
2013/10/18	Friday	64	0	0	64
2013/10/19	Saturday	27	2	0	29
2013/10/21	Monday	21	0	0	21
2013/10/24	Thursday	148	5	0	153
2013/10/25	Friday	53	4	0	57
2013/10/28	Monday	22	0	0	22
2013/10/29	Tuesday	79	1	0	80
2013/10/30	Wednesday	42	2	0	44
2013/10/31	Thursday	67	3	0	70
2013/11/01	Friday	42	0	0	42
2013/11/04	Monday	29	1	0	30
2013/11/05	Tuesday	40	2	0	42
2013/11/06	Wednesday	56	0	0	56
2013/11/07	Thursday	47	1	0	48
2013/11/08	Friday	6	1	0	7
2013/11/09	Saturday	38	0	0	38
2013/11/11	Monday	42	1	1	44
2013/11/12	Tuesday	38	0	2	40
2013/11/13	Wednesday	42	1	0	43
2013/11/14	Thursday	40	1	1	42
2013/11/15	Friday	43	1	0	44
2013/11/18	Monday	22	0	0	22
2013/11/19	Tuesday	67	5	0	72
2013/11/20	Wednesday	22	0	0	22
2013/11/21	Thursday	10	2	0	12
2013/11/22	Friday	99	1	0	100
2013/11/25	Monday	42	2	0	44
2013/11/26	Tuesday	59	4	0	63
2013/11/27	Wednesday	44	0	0	44
2013/11/28	Thursday	52	2	0	54
2013/11/29	Friday	41	3	0	44
2013/11/30	Saturday	10	0	0	10
2013/12/02	Monday	29	2	0	31
2013/12/03	Tuesday	4	0	0	4
2013/12/04	Wednesday	44	0	0	44
2013/12/05	Thursday	41	1	0	42
2013/12/06	Friday	21	1	0	22
2013/12/07	Saturday	19	0	0	19
2013/12/09	Monday	17	3	0	20
2013/12/10	Tuesday	51	2	0	53
2013/12/11	Wednesday	85	0	1	86
2013/12/12	Thursday	43	2	0	45
2013/12/13	Friday	42	2	0	44
2013/12/14	Saturday	22	0	0	22
2013/12/17	Tuesday	39	2	0	41
2013/12/18	Wednesday	20	2	0	22
2013/12/19	Thursday	39	1	0	40
2013/12/20	Friday	81	1	0	82
2013/12/21	Saturday	18	0	0	18
2013/12/23	Monday	41	3	0	44
2013/12/24	Tuesday	48	2	0	50
2013/12/27	Friday	36	2	0	38
2013/12/30	Monday	36	1	0	37
2013/12/31	Tuesday	39	3	2	44
2014/01/02	Thursday	41	3	0	44
2014/01/03	Friday	33	4	0	37
2014/01/04	Saturday	36	0	0	36
2014/01/06	Monday	16	2	0	18
2014/01/07	Tuesday	43	0	0	43
2014/01/08	Wednesday	41	1	0	42
2014/01/09	Thursday	62	0	0	62
2014/01/10	Friday	42	1	1	44
2014/01/11	Saturday	22	0	0	22
2014/01/13	Monday	52	7	1	60
2014/01/14	Tuesday	41	1	0	42
2014/01/15	Wednesday	63	4	0	67
2014/01/16	Thursday	52	2	1	55
2014/01/17	Friday	56	2	0	58
2014/01/18	Saturday	36	4	0	40
2014/01/20	Monday	21	0	0	21
2014/01/21	Tuesday	40	3	0	43
2014/01/22	Wednesday	42	1	0	43
2014/01/23	Thursday	42	2	0	44
2014/01/24	Friday	37	5	0	42
2014/01/25	Saturday	48	5	0	53
2014/01/27	Monday	21	1	0	22
2014/01/28	Tuesday	36	2	0	38
2014/01/29	Wednesday	44	0	2	46
2014/01/30	Thursday	61	3	0	64
2014/01/31	Friday	42	1	0	43
2014/02/01	Saturday	42	1	1	44
2014/02/03	Monday	22	0	0	22
2014/02/04	Tuesday	50	2	0	52
2014/02/05	Wednesday	42	1	0	43
2014/02/06	Thursday	45	1	0	46
2014/02/07	Friday	21	0	0	21
2014/02/08	Saturday	37	4	0	41
2014/02/10	Monday	40	2	0	42
2014/02/11	Tuesday	39	2	0	41
2014/02/12	Wednesday	21	1	0	22
2014/02/13	Thursday	74	4	0	78
2014/02/14	Friday	51	2	0	53
2014/02/15	Saturday	38	2	0	40
2014/02/17	Monday	31	2	0	33
2014/02/18	Tuesday	29	0	0	29
2014/02/19	Wednesday	32	1	0	33
2014/02/20	Thursday	61	1	0	62
2014/02/21	Friday	44	2	0	46
2014/02/24	Monday	1	0	0	1
2014/02/25	Tuesday	99	5	0	104
2014/02/26	Wednesday	43	1	0	44
2014/02/27	Thursday	41	2	0	43
2014/02/28	Friday	56	5	1	62
2014/03/01	Saturday	21	0	0	21
2014/03/03	Monday	36	1	0	37
2014/03/04	Tuesday	39	0	0	39
2014/03/05	Wednesday	58	2	0	60
2014/03/06	Thursday	39	1	0	40
2014/03/07	Friday	51	1	0	52
2014/03/08	Saturday	20	2	0	22
2014/03/10	Monday	34	1	0	35
2014/03/11	Tuesday	43	1	0	44
2014/03/12	Wednesday	43	1	0	44
2014/03/13	Thursday	60	1	0	61
2014/03/14	Friday	35	3	0	38
2014/03/15	Saturday	20	2	0	22
2014/03/17	Monday	36	0	0	36
2014/03/18	Tuesday	39	2	1	42
2014/03/19	Wednesday	43	0	0	43
2014/03/20	Thursday	71	2	0	73
2014/03/21	Friday	18	1	0	19
2014/03/24	Monday	31	2	1	34
2014/03/25	Tuesday	57	6	0	63
2014/03/26	Wednesday	57	0	0	57
2014/03/27	Thursday	49	0	1	50
2014/03/28	Friday	46	4	1	51
2014/03/29	Saturday	22	0	0	22
2014/03/31	Monday	42	0	0	42
2014/04/01	Tuesday	39	2	0	41
2014/04/02	Wednesday	36	3	0	39
2014/04/03	Thursday	59	4	0	63
2014/04/04	Friday	42	0	0	42
2014/04/05	Saturday	16	0	0	16
2014/04/07	Monday	40	2	0	42
2014/04/08	Tuesday	54	5	1	60
2014/04/09	Wednesday	58	3	0	61
2014/04/10	Thursday	76	1	1	78
2014/04/11	Friday	41	0	1	42
2014/04/15	Tuesday	117	8	1	126
2014/04/16	Wednesday	79	2	0	81
2014/04/17	Thursday	56	2	0	58
2014/04/18	Friday	41	1	1	43
2014/04/22	Tuesday	39	2	1	42
2014/04/23	Wednesday	44	1	0	45
2014/04/24	Thursday	50	2	0	52
2014/04/25	Friday	57	1	0	58
2014/04/26	Saturday	19	1	0	20
2014/04/29	Tuesday	44	0	0	44
2014/04/30	Wednesday	55	1	0	56
2014/05/02	Friday	38	2	0	40
2014/05/03	Saturday	70	3	0	73
2014/05/05	Monday	22	0	0	22
2014/05/06	Tuesday	29	1	0	30
2014/05/08	Thursday	42	2	0	44
2014/05/09	Friday	80	2	0	82
2014/05/10	Saturday	20	1	0	21
2014/05/12	Monday	42	1	0	43
2014/05/13	Tuesday	33	0	0	33
2014/05/14	Wednesday	75	3	0	78
2014/05/15	Thursday	45	4	0	49
2014/05/17	Saturday	63	6	0	69
2014/05/19	Monday	42	1	1	44
2014/05/20	Tuesday	18	1	0	19
2014/05/21	Wednesday	67	6	0	73
2014/05/22	Thursday	49	3	1	53
2014/05/23	Friday	43	0	0	43
2014/05/24	Saturday	32	2	0	34
2014/05/26	Monday	33	0	0	33
2014/05/27	Tuesday	41	0	0	41
2014/05/28	Wednesday	43	1	0	44
2014/05/29	Thursday	43	0	1	44
2014/05/30	Friday	18	0	0	18
2014/05/31	Saturday	54	3	0	57
2014/06/02	Monday	43	1	0	44
2014/06/03	Tuesday	36	6	0	42
2014/06/04	Wednesday	36	2	0	38
2014/06/05	Thursday	22	4	0	26
2014/06/06	Friday	35	2	0	37
2014/06/07	Saturday	21	1	0	22
2014/06/09	Monday	32	1	0	33
2014/06/10	Tuesday	37	0	0	37
2014/06/11	Wednesday	42	0	0	42
2014/06/12	Thursday	48	3	1	52
2014/06/13	Friday	54	4	1	59
2014/06/14	Saturday	40	4	0	44
2014/06/17	Tuesday	42	2	0	44
2014/06/18	Wednesday	53	0	2	55
2014/06/19	Thursday	40	0	1	41
2014/06/20	Friday	39	2	1	42
2014/06/21	Saturday	19	0	0	19
2014/06/23	Monday	40	4	0	44
2014/06/24	Tuesday	41	0	0	41
2014/06/25	Wednesday	38	2	0	40
2014/06/26	Thursday	56	4	1	61
2014/06/27	Friday	76	4	1	81
2014/06/28	Saturday	40	1	0	41
2014/06/30	Monday	37	1	0	38
2014/07/01	Tuesday	38	0	0	38
2014/07/02	Wednesday	36	1	3	40
2014/07/03	Thursday	63	2	0	65
2014/07/04	Friday	43	1	0	44
2014/07/05	Saturday	14	2	0	16
2014/07/07	Monday	42	2	0	44
2014/07/08	Tuesday	16	2	1	19
2014/07/09	Wednesday	50	3	1	54
2014/07/10	Thursday	43	1	0	44
2014/07/11	Friday	18	1	1	20
2014/07/12	Saturday	40	2	0	42
2014/07/14	Monday	42	0	0	42
2014/07/15	Tuesday	58	4	0	62
2014/07/16	Wednesday	42	1	0	43
2014/07/17	Thursday	41	0	0	41
2014/07/18	Friday	50	2	1	53
2014/07/19	Saturday	21	1	0	22
2014/07/21	Monday	21	1	0	22
2014/07/22	Tuesday	40	1	1	42
2014/07/23	Wednesday	56	2	0	58
2014/07/24	Thursday	62	0	0	62
2014/07/25	Friday	55	1	1	57
2014/07/26	Saturday	19	3	0	22
2014/07/28	Monday	42	2	0	44
2014/07/29	Tuesday	40	1	0	41
2014/07/30	Wednesday	59	1	0	60
2014/07/31	Thursday	50	1	3	54
2014/08/01	Friday	43	0	1	44
2014/08/02	Saturday	33	2	1	36
2014/08/04	Monday	43	0	0	43
2014/08/05	Tuesday	38	1	0	39
2014/08/06	Wednesday	41	2	0	43
2014/08/07	Thursday	60	3	0	63
2014/08/08	Friday	63	1	1	65
2014/08/09	Saturday	20	2	0	22
2014/08/11	Monday	38	3	0	41
2014/08/12	Tuesday	57	3	2	62
2014/08/13	Wednesday	41	0	1	42
2014/08/14	Thursday	83	3	0	86
2014/08/15	Friday	38	1	0	39
2014/08/16	Saturday	18	2	0	20
2014/08/18	Monday	18	0	0	18
2014/08/19	Tuesday	72	4	0	76
2014/08/20	Wednesday	61	1	0	62
2014/08/21	Thursday	41	2	0	43
2014/08/22	Friday	39	2	0	41
2014/08/23	Saturday	37	4	0	41
2014/08/25	Monday	22	0	0	22
2014/08/26	Tuesday	64	2	0	66
2014/08/27	Wednesday	38	2	1	41
2014/08/28	Thursday	84	2	0	86
2014/08/29	Friday	61	1	1	63
2014/08/30	Saturday	20	1	0	21
2014/09/01	Monday	42	2	0	44
2014/09/02	Tuesday	34	0	0	34
2014/09/03	Wednesday	61	0	0	61
2014/09/04	Thursday	41	2	0	43
2014/09/05	Friday	56	2	0	58
2014/09/06	Saturday	38	2	0	40
2014/09/08	Monday	40	1	1	42
2014/09/09	Tuesday	21	0	0	21
2014/09/10	Wednesday	42	2	0	44
2014/09/11	Thursday	62	2	1	65
2014/09/12	Friday	85	0	0	85
2014/09/13	Saturday	20	2	0	22
2014/09/15	Monday	38	2	0	40
2014/09/16	Tuesday	34	5	1	40
2014/09/17	Wednesday	22	0	0	22
2014/09/18	Thursday	77	2	1	80
2014/09/19	Friday	42	1	0	43
2014/09/20	Saturday	37	2	0	39
2014/09/22	Monday	40	0	0	40
2014/09/23	Tuesday	42	1	0	43
2014/09/25	Thursday	43	4	1	48
2014/09/26	Friday	80	1	1	82
2014/09/27	Saturday	21	1	0	22
2014/09/29	Monday	19	2	0	21
2014/09/30	Tuesday	52	8	1	61
2014/10/01	Wednesday	64	0	0	64
2014/10/02	Thursday	54	1	1	56
2014/10/03	Friday	59	2	4	65
2014/10/04	Saturday	42	0	1	43
2014/10/06	Monday	20	1	0	21
2014/10/07	Tuesday	56	0	0	56
2014/10/08	Wednesday	42	0	0	42
2014/10/09	Thursday	41	0	0	41
2014/10/10	Friday	60	1	1	62
2014/10/11	Saturday	18	1	0	19
2014/10/13	Monday	20	1	0	21
2014/10/14	Tuesday	19	0	3	22
2014/10/15	Wednesday	79	4	0	83
2014/10/16	Thursday	57	0	0	57
2014/10/17	Friday	63	3	0	66
2014/10/18	Saturday	38	0	2	40
2014/10/20	Monday	34	1	1	36
2014/10/21	Tuesday	35	1	0	36
2014/10/22	Wednesday	41	1	1	43
2014/10/23	Thursday	61	3	0	64
2014/10/24	Friday	36	3	1	40
2014/10/25	Saturday	60	0	0	60
2014/10/28	Tuesday	63	2	1	66
2014/10/29	Wednesday	62	4	0	66
2014/10/30	Thursday	21	1	0	22
2014/10/31	Friday	83	4	0	87
2014/11/01	Saturday	27	5	1	33
2014/11/03	Monday	20	1	0	21
2014/11/04	Tuesday	56	6	0	62
2014/11/05	Wednesday	58	5	3	66
2014/11/06	Thursday	31	2	0	33
2014/11/07	Friday	61	1	0	62
2014/11/08	Saturday	33	3	0	36
2014/11/10	Monday	42	0	1	43
2014/11/11	Tuesday	55	1	0	56
2014/11/12	Wednesday	38	0	0	38
2014/11/13	Thursday	26	2	1	29
2014/11/14	Friday	92	0	1	93
2014/11/17	Monday	60	2	0	62
2014/11/18	Tuesday	36	2	0	38
2014/11/19	Wednesday	50	3	0	53
2014/11/20	Thursday	64	2	0	66
2014/11/21	Friday	72	0	0	72
2014/11/22	Saturday	21	1	0	22
2014/11/24	Monday	29	2	0	31
2014/11/25	Tuesday	40	1	0	41
2014/11/26	Wednesday	39	1	0	40
2014/11/27	Thursday	83	3	0	86
2014/11/28	Friday	43	1	0	44
2014/11/29	Saturday	50	0	1	51
2014/12/01	Monday	40	2	0	42
2014/12/02	Tuesday	43	0	0	43
2014/12/03	Wednesday	64	0	0	64
2014/12/04	Thursday	57	3	0	60
2014/12/05	Friday	42	0	0	42
2014/12/06	Saturday	33	2	0	35
2014/12/08	Monday	19	1	0	20
2014/12/09	Tuesday	77	0	1	78
2014/12/10	Wednesday	54	1	0	55
2014/12/11	Thursday	31	1	0	32
2014/12/12	Friday	51	3	0	54
2014/12/13	Saturday	42	1	0	43
2014/12/15	Monday	22	0	0	22
2014/12/17	Wednesday	55	6	2	63
2014/12/18	Thursday	95	4	0	99
2014/12/19	Friday	42	0	2	44
2014/12/20	Saturday	33	2	0	35
2014/12/22	Monday	43	2	0	45
2014/12/23	Tuesday	21	1	0	22
2014/12/24	Wednesday	104	1	0	105
2014/12/29	Monday	42	1	0	43
2014/12/30	Tuesday	81	3	1	85
2014/12/31	Wednesday	60	1	0	61
2015/01/02	Friday	64	1	1	66
2015/01/03	Saturday	43	0	0	43
2015/01/05	Monday	22	0	0	22
2015/01/06	Tuesday	42	1	0	43
2015/01/07	Wednesday	58	2	0	60
2015/01/08	Thursday	59	4	0	63
2015/01/09	Friday	43	0	0	43
2015/01/10	Saturday	32	0	0	32
2015/01/12	Monday	32	1	0	33
2015/01/13	Tuesday	33	0	1	34
2015/01/14	Wednesday	64	1	0	65
2015/01/15	Thursday	82	2	2	86
2015/01/16	Friday	38	1	0	39
2015/01/17	Saturday	62	2	0	64
2015/01/19	Monday	38	3	0	41
2015/01/20	Tuesday	52	3	0	55
2015/01/21	Wednesday	36	1	0	37
2015/01/22	Thursday	39	0	0	39
2015/01/23	Friday	80	3	1	84
2015/01/24	Saturday	61	0	0	61
2015/01/26	Monday	22	0	0	22
2015/01/27	Tuesday	34	3	0	37
2015/01/29	Thursday	100	2	1	103
2015/01/30	Friday	59	2	0	61
2015/01/31	Saturday	60	1	0	61
2015/02/02	Monday	62	0	2	64
2015/02/04	Wednesday	44	1	0	45
2015/02/05	Thursday	43	0	0	43
2015/02/06	Friday	43	1	0	44
2015/02/07	Saturday	82	2	1	85
2015/02/09	Monday	21	1	0	22
2015/02/10	Tuesday	97	2	2	101
2015/02/11	Wednesday	63	0	0	63
2015/02/12	Thursday	58	3	0	61
2015/02/13	Friday	60	1	0	61
2015/02/14	Saturday	42	1	0	43
2015/02/16	Monday	40	0	0	40
2015/02/17	Tuesday	57	1	3	61
2015/02/18	Wednesday	22	0	0	22
2015/02/19	Thursday	22	0	0	22
2015/02/20	Friday	60	3	0	63
2015/02/21	Saturday	92	5	3	100
2015/02/23	Monday	21	0	1	22
2015/02/24	Tuesday	35	2	1	38
2015/02/25	Wednesday	63	2	0	65
2015/02/26	Thursday	82	1	1	84
2015/02/27	Friday	38	0	0	38
2015/02/28	Saturday	42	1	0	43
2015/03/02	Monday	42	1	0	43
2015/03/03	Tuesday	57	2	2	61
2015/03/04	Wednesday	41	0	2	43
2015/03/05	Thursday	63	1	1	65
2015/03/06	Friday	81	2	0	83
2015/03/07	Saturday	20	2	0	22
2015/03/09	Monday	65	0	1	66
2015/03/10	Tuesday	59	2	2	63
2015/03/11	Wednesday	36	1	0	37
2015/03/12	Thursday	39	4	0	43
2015/03/13	Friday	79	1	0	80
2015/03/14	Saturday	16	3	0	19
2015/03/16	Monday	77	4	2	83
2015/03/17	Tuesday	22	0	0	22
2015/03/18	Wednesday	60	2	0	62
2015/03/19	Thursday	79	1	0	80
2015/03/20	Friday	21	0	0	21
2015/03/21	Saturday	44	2	1	47
2015/03/23	Monday	42	1	0	43
2015/03/24	Tuesday	79	5	2	86
2015/03/25	Wednesday	83	2	2	87
2015/03/26	Thursday	59	4	0	63
2015/03/27	Friday	62	2	1	65
2015/03/28	Saturday	20	1	0	21
2015/03/30	Monday	43	0	1	44
2015/03/31	Tuesday	61	0	0	61
2015/04/01	Wednesday	57	1	0	58
2015/04/02	Thursday	40	0	0	40
2015/04/03	Friday	64	1	1	66
2015/04/09	Thursday	42	0	0	42
2015/04/10	Friday	150	8	2	160
2015/04/11	Saturday	103	3	0	106
2015/04/13	Monday	14	2	0	16
2015/04/14	Tuesday	101	7	0	108
2015/04/15	Wednesday	60	1	0	61
2015/04/16	Thursday	59	2	1	62
2015/04/17	Friday	60	2	2	64
2015/04/18	Saturday	59	2	0	61
2015/04/20	Monday	22	0	0	22
2015/04/21	Tuesday	61	3	0	64
2015/04/22	Wednesday	80	2	1	83
2015/04/23	Thursday	40	3	0	43
2015/04/24	Friday	56	1	1	58
2015/04/25	Saturday	21	0	0	21
2015/04/28	Tuesday	18	0	0	18
2015/04/29	Wednesday	78	2	0	80
2015/04/30	Thursday	83	1	0	84
2015/05/01	Friday	17	0	0	17
2015/05/04	Monday	20	1	0	21
2015/05/05	Tuesday	97	6	1	104
2015/05/06	Wednesday	61	3	2	66
2015/05/07	Thursday	58	3	0	61
2015/05/08	Friday	65	1	0	66
2015/05/09	Saturday	84	2	0	86
2015/05/12	Tuesday	20	2	0	22
2015/05/13	Wednesday	119	2	1	122
2015/05/14	Thursday	62	0	3	65
2015/05/15	Friday	82	2	2	86
2015/05/16	Saturday	21	1	0	22
2015/05/19	Tuesday	63	1	0	64
2015/05/20	Wednesday	79	2	0	81
2015/05/21	Thursday	42	1	0	43
2015/05/22	Friday	76	2	3	81
2015/05/23	Saturday	18	1	0	19
2015/05/25	Monday	42	0	0	42
2015/05/26	Tuesday	76	7	0	83
2015/05/27	Wednesday	78	1	1	80
2015/05/28	Thursday	39	1	0	40
2015/05/29	Friday	62	2	1	65
2015/05/30	Saturday	56	2	0	58
2015/06/01	Monday	19	1	0	20
2015/06/02	Tuesday	42	0	1	43
2015/06/03	Wednesday	38	1	1	40
2015/06/04	Thursday	98	3	0	101
2015/06/05	Friday	159	0	2	161
2015/06/06	Saturday	35	0	0	35
2015/06/08	Monday	63	0	0	63
2015/06/09	Tuesday	80	2	0	82
2015/06/10	Wednesday	36	1	0	37
2015/06/11	Thursday	60	1	0	61
2015/06/12	Friday	75	2	1	78
2015/06/13	Saturday	19	2	0	21
2015/06/15	Monday	19	1	1	21
2015/06/17	Wednesday	99	4	1	104
2015/06/18	Thursday	57	1	0	58
2015/06/19	Friday	100	4	0	104
2015/06/20	Saturday	40	1	0	41
2015/06/22	Monday	18	1	0	19
2015/06/23	Tuesday	90	3	1	94
2015/06/24	Wednesday	42	1	0	43
2015/06/25	Thursday	58	3	1	62
2015/06/26	Friday	57	2	0	59
2015/06/27	Saturday	20	1	1	22
2015/06/29	Monday	40	2	0	42
2015/06/30	Tuesday	62	2	0	64
2015/07/01	Wednesday	62	1	0	63
2015/07/02	Thursday	68	2	1	71
2015/07/03	Friday	52	2	0	54
2015/07/04	Saturday	35	1	0	36
2015/07/06	Monday	42	0	0	42
2015/07/07	Tuesday	55	4	0	59
2015/07/08	Wednesday	89	2	0	91
2015/07/09	Thursday	49	2	1	52
2015/07/10	Friday	57	1	1	59
2015/07/11	Saturday	9	1	0	10
2015/07/13	Monday	43	0	0	43
2015/07/14	Tuesday	55	3	0	58
2015/07/15	Wednesday	83	2	0	85
2015/07/16	Thursday	36	2	1	39
2015/07/17	Friday	56	0	0	56
2015/07/18	Saturday	33	1	0	34
2015/07/20	Monday	40	0	0	40
2015/07/21	Tuesday	63	2	0	65
2015/07/22	Wednesday	56	3	0	59
2015/07/23	Thursday	40	0	0	40
2015/07/24	Friday	59	5	0	64
2015/07/25	Saturday	19	0	0	19
2015/07/27	Monday	41	2	0	43
2015/07/28	Tuesday	54	1	0	55
2015/07/29	Wednesday	80	0	0	80
2015/07/30	Thursday	57	4	1	62
2015/07/31	Friday	29	0	0	29
